# Supplementary material
Source: PubMed Central journal article supplement (PMC5741159)
Supplement: DC162765SupplementaryData.pdf [file DC162765SupplementaryData.pdf]

SUPPLEMENTARY DATA

**Supplementary Table 1.** Studies documenting racial, ethnic, and/or socioeconomic disparities in exposures to EDCs associated with metabolic disease. ‡: Statistical comparisons between groups not reported, or not possible due to varying detection limits and high non-detect frequency. §: group differences are significant, but single comparisons between groups were not reported. †: Values were estimated from graphs using Digitizelt software (<http://www.digitizeit.de>). \*Denotes statistically significant differences at P<0.05 or lower.

**Abbreviations:** AA, African-American; BBP, benzyl butyl phthalate; CI, confidence interval; DBP, dibutyl phthalate; DDE, dichlorodiphenyldichloroethylene; DDT, dichlorodiphenyltrichloroethane; DEHP, di-2-ethylhexyl phthalate; GM: geometric mean; GSD, geometric standard deviation; GSE, geometric standard error; HCB, hexachlorobenzene; β-HCH, β-hexachlorocyclohexane; LSGM, least square geometric mean; MA, Mexican-American; MBzP, mono-benzyl phthalate; MEP, monoethyl phthalate; MnBP, mono-n-butyl phthalate; NHANES: National Health and Nutrition Examination Survey; NHW, Non-Hispanic White; NO<sub>x</sub>, nitrogen oxides; PM: particulate matter; ppb, parts per billion; ppm, parts per million; Ref., reference; RSE, relative standard error.

| Polychlorinated Biphenyls (PCBs) |                                                                                             |                                                       |                                     |                      |                     |
|----------------------------------|---------------------------------------------------------------------------------------------|-------------------------------------------------------|-------------------------------------|----------------------|---------------------|
| Reference                        | Population                                                                                  | Assessment                                            | Comparisons                         | Pollutants           | Differences         |
| James et al., 2002 (1)           | Pregnant Women from the Child Health and Development study cohort 1963-1967                 | Percent difference of serum PCBs between [95% CI]     | Non-White vs. White                 | PCB 105              | 6.57 [-7.32-22.1]†  |
|                                  |                                                                                             |                                                       |                                     | PCB 110              | -1.84 [-20.5-21.2]† |
|                                  |                                                                                             |                                                       |                                     | PCB 118              | -1.37 [-11.8-10.2]† |
|                                  |                                                                                             |                                                       |                                     | PCB 137              | -15.1 [-30.9-3.12]† |
|                                  |                                                                                             |                                                       |                                     | PCB 138              | 9.5 [-1.69-22.2]†   |
|                                  |                                                                                             |                                                       |                                     | PCB 153              | 5.35 [-4.3-15.9]†   |
|                                  |                                                                                             |                                                       |                                     | PCB 170              | 6.68 [-3.19-18.5]†  |
|                                  |                                                                                             |                                                       |                                     | PCB 180              | 12.8 [2.52-24.2]†*  |
|                                  |                                                                                             |                                                       |                                     | PCB 187              | 17.9 [5.83-31.9]†*  |
|                                  |                                                                                             |                                                       | Sum PCBs                            | 6.28 [-2.05-15.9]    |                     |
| Krieger et al. 1994 (2)          | Women from the Northern California Region Kaiser Permanente Medical Care Program, 1964-1971 | Adjusted mean difference of serum PCBs (ppb) [95% CI] | AA vs. NHW                          | PCBs (not specified) | 1.4 [0.7-2.1]*      |
|                                  |                                                                                             |                                                       | AA vs. NHW (Breast Cancer Patients) |                      | 1.7 [0.8-2.5]*      |
|                                  |                                                                                             |                                                       | AA vs. NHW (Control Patients)       |                      | 1.1 [0.0-2.2]       |

SUPPLEMENTARY DATA

|                                   |                                           |                                                                                                  |                     |                     |                                        |
|-----------------------------------|-------------------------------------------|--------------------------------------------------------------------------------------------------|---------------------|---------------------|----------------------------------------|
| Weintraub and Birnbaum, 2008 (3)  | National Adipose Tissue Survey 1972-1979  | Population percentage with >3 ppm PCB in adipose tissue; no statistical comparisons are reported | Non-White vs. White | Total PCBs          | 5.05 vs. 4.52 (1972)†                  |
|                                   |                                           |                                                                                                  |                     |                     | 11.0 vs. 4.68 (1973)†                  |
|                                   |                                           |                                                                                                  |                     |                     | 5.58 vs. 4.89 (1974)†                  |
|                                   |                                           |                                                                                                  |                     |                     | 12.6 vs. 7.00 (1975)†                  |
|                                   |                                           |                                                                                                  |                     |                     | 12.6 vs. 6.03 (1976)†                  |
|                                   |                                           |                                                                                                  |                     |                     | 14.6 vs. 8.96 (1977)†                  |
|                                   |                                           |                                                                                                  |                     |                     | 10.1 vs. 8.02 (1978)†                  |
|                                   |                                           |                                                                                                  |                     |                     | 6.11 vs. 4.68 (1979)†                  |
| 9.71 vs. 6.10 (Average, '72-'79)* |                                           |                                                                                                  |                     |                     |                                        |
| Lordo et al. 1996 (4)             | National Human Adipose Tissue Survey 1986 | Average adipose levels (ng/g) [RSE]                                                              | Non-White vs. White | Tetrachlorobiphenyl | 73.0 [22] vs. 53.0 [11]                |
|                                   |                                           |                                                                                                  |                     | Pentachlorobiphenyl | 141 [30] vs. 133 [14]                  |
|                                   |                                           |                                                                                                  |                     | Hexachlorobiphenyl  | 435 [15] vs. 289 [8]                   |
|                                   |                                           |                                                                                                  |                     | Heptachlorobiphenyl | 195 [31] vs. 111 [24]                  |
| Wang et al., 2009 (5)             | Pregnant women from NHANES 1999-2002      | GM for serum lipid adjusted PCBs [95% CI]                                                        | AA vs. NHW          | PCB-126 (pg/g)      | 20.3 [16.9–24.5] vs. 13.9 [12.4–15.6]* |
|                                   |                                           |                                                                                                  |                     | PCB-138/158 (ng/g)  | 21.7 [19.4–24.2] vs. 16.2 [15.1–17.3]* |
|                                   |                                           |                                                                                                  |                     | PCB-153 (ng/g)      | 30.5 [28–33.2] vs. 22.8 [21.5–24.2]*   |
|                                   |                                           |                                                                                                  |                     | PCB-169 (pg/g)      | 13.4 [12.1–14.9] vs. 10.9 [9.9–12]*    |
|                                   |                                           |                                                                                                  |                     | PCB-180 (ng/g)      | 17.2 [16.1–18.4] vs. 14.1 [13.2–15]*   |
|                                   |                                           |                                                                                                  | MA vs. NHW          | PCB-126 (pg/g)      | 15.9 [14.2–17.7] vs. 13.9 [12.4–15.6]  |
|                                   |                                           |                                                                                                  |                     | PCB-138/158 (ng/g)  | 13.9 [12.6–15.4] vs. 16.2 [15.1–17.3]* |
|                                   |                                           |                                                                                                  |                     | PCB-153 (ng/g)      | 18.2 [16.5–20] vs. 22.8 [21.5–24.2]*   |
|                                   |                                           |                                                                                                  |                     | PCB-169 (pg/g)      | 9.4 [8.7–10.2] vs. 10.9 [9.9–12]*      |
|                                   |                                           |                                                                                                  |                     | PCB-180 (ng/g)      | 12.3 [11.5–13.2] vs.                   |

SUPPLEMENTARY DATA

|                           |                                                  |                                                            |                                                                 |                                           |                              |
|---------------------------|--------------------------------------------------|------------------------------------------------------------|-----------------------------------------------------------------|-------------------------------------------|------------------------------|
|                           |                                                  |                                                            |                                                                 |                                           | 14.1 [13.2–15]*              |
| Bouchard et al., 2014 (6) | NHANES 1999-2002 Elders 60-84 years old          | GM [GSD] of serum PCBs (ng/g lipid)                        | AA vs. NHW                                                      | Sum of 12 non-dioxin and dioxin-like PCBs | 410 [1.74] vs. 283 [1.67]*   |
|                           |                                                  |                                                            | MA vs. NHW                                                      |                                           | 206 [1.76] vs. 283 [1.67]*   |
|                           |                                                  |                                                            | First PIR quartile vs. fourth quartile                          |                                           | 244 [1.80] vs. 294 [1.72]    |
| Xue et al., 2014 (7)      | NHANES 2001-2004                                 | Total blood concentration of 30 PCB congeners (ng/g lipid) | AA vs. NHW (>30 years old)                                      | 30 PCB congeners                          | 1.97 vs. 1.54†               |
|                           |                                                  |                                                            | AA vs. NHW (50+ years old)                                      |                                           | 3.08 vs. 2.02                |
|                           |                                                  |                                                            | MA vs. NHW (>30 years old)                                      |                                           | 1.50 vs. 1.54†               |
|                           |                                                  |                                                            | MA vs. NHW (50+ years old)                                      |                                           | 1.57 vs. 2.02                |
|                           |                                                  |                                                            | AA vs. NHW (50+ years old, female, 95 <sup>th</sup> percentile) |                                           | 7.68 vs. 4.72                |
|                           |                                                  |                                                            | AA vs. NHW (50+ years old, male, 95 <sup>th</sup> percentile)   |                                           | 7.70 vs. 4.21                |
| Sjodin et al., 2014 (8)   | NHANES 2003-2008 Women and men > 60 years of age | Serum PCB 153 (ng/g lipid) ± 95%CI                         | AA vs. NHW Females ('03-'04)                                    | PCB 153 in people ≥60 years old           | 146.5 ± 27.7 vs. 62.1 ± 7.8* |
|                           |                                                  |                                                            | AA vs. NHW Females ('05-'06)                                    |                                           | 129.5 ± 74.8 vs. 58.0 ± 10.8 |
|                           |                                                  |                                                            | AA vs. NHW Females ('07-'08)                                    |                                           | 102.4 ± 15.6 vs. 56.4 ± 7.8* |
|                           |                                                  |                                                            | AA vs. NHW Males ('03-'04)                                      |                                           | 153 ± 53.6 vs. 65.0 ± 11.0*  |
|                           |                                                  |                                                            | AA vs. NHW Males ('05-'06)                                      |                                           | 103.5 ± 40.9 vs. 60.4 ± 6.2  |
|                           |                                                  |                                                            | AA vs. NHW Males ('07-'08)                                      |                                           | 94.5 ± 29.3 vs. 63.9 ± 10.6  |
|                           |                                                  |                                                            | MA vs. NHW Females ('03-'04)                                    |                                           | 39.5 ± 11.4 vs. 62.1 ± 7.8*  |

SUPPLEMENTARY DATA

|           |        |            |                              |                                   |                             |                     |
|-----------|--------|------------|------------------------------|-----------------------------------|-----------------------------|---------------------|
|           |        |            | MA vs. NHW Females ('05-'06) |                                   | 36.2 ± 9.3 vs. 58.0 ± 10.8* |                     |
|           |        |            | MA vs. NHW Females ('07-'08) |                                   | 40.9 ± 32.1 vs. 56.4 ± 7.8  |                     |
|           |        |            | MA vs. NHW Males ('03-'04)   |                                   | 36.7 ± 5.5 vs. 65.0 ± 11.0* |                     |
|           |        |            | MA vs. NHW Males ('05-'06)   |                                   | 37.3 ± 16.8 vs. 60.4 ± 6.2  |                     |
|           |        |            | MA vs. NHW Males ('07-'08)   |                                   | 39.5 ± 8.9 vs. 63.9 ± 10.6* |                     |
|           |        |            | AA vs. NHW Females ('03-'04) | PCB 153 in people 40-59 years old | 53.2 ± 11.9 vs. 34.2 ± 3.5* |                     |
|           |        |            | AA vs. NHW Females ('05-'06) |                                   | 41.2 ± 10.1 vs. 27.8 ± 2.5* |                     |
|           |        |            | AA vs. NHW Females ('07-'08) |                                   | 35.7 ± 8.0 vs. 27.7 ± 2.3   |                     |
|           |        |            | AA vs. NHW Males ('03-'04)   |                                   | 59.9 ± 27.2 vs. 38.2 ± 9.4  |                     |
|           |        |            | AA vs. NHW Males ('05-'06)   |                                   | 38.8 ± 15.3 vs. 36.4 ± 16.4 |                     |
|           |        |            | AA vs. NHW Males ('07-'08)   |                                   | 41.0 ± 18.6 vs. 28.2 ± 4.8  |                     |
|           |        |            | MA vs. NHW Females ('03-'04) |                                   | 23.7 ± 10.5 vs. 34.2 ± 3.5  |                     |
|           |        |            | MA vs. NHW Females ('05-'06) |                                   | 19.1 ± 3.3 vs. 27.8 ± 2.5*  |                     |
|           |        |            | MA vs. NHW Females ('07-'08) |                                   | 20.9 ± 6.0 vs. 27.7 ± 2.3   |                     |
|           |        |            | MA vs. NHW Males ('03-'04)   |                                   | 26.5 ± 7.3 vs. 38.2 ± 9.4   |                     |
|           |        |            | MA vs. NHW Males ('05-'06)   |                                   | 16.5 ± 2.6 vs. 36.4 ± 16.4* |                     |
|           |        |            | MA vs. NHW Males ('07-'08)   |                                   | 22.4 ± 6.1 vs. 28.2 ± 4.8   |                     |
| Patterson | NHANES | Serum PCBs | AA vs. NHW (GM)              |                                   | Sum of 35 PCBs              | 148.3 [129.0-170.5] |

SUPPLEMENTARY DATA

|                                       |                                                       |                                         |                                          |                   |                                               |
|---------------------------------------|-------------------------------------------------------|-----------------------------------------|------------------------------------------|-------------------|-----------------------------------------------|
| et al., 2009<br>(9)                   | 2003-2004                                             | (ng/g lipid)<br>[95% CI]                |                                          |                   | vs. 142.7 [134.2-151.9]                       |
|                                       |                                                       |                                         | MA vs. NHW (GM)                          |                   | 71.2 [61.0-83.1] vs. 142.7 [134.2-151.9]*     |
|                                       |                                                       |                                         | AA vs. NHW (90 <sup>th</sup> percentile) |                   | 604.6 [454.4-830.6] vs. 406.0 [363.9-433.8]*  |
|                                       |                                                       |                                         | MA vs. NHW (90 <sup>th</sup> percentile) |                   | 188.2 [155.8-220.3] vs. 406.0 [363.9-433.8]*  |
|                                       |                                                       |                                         | AA vs. NHW (95 <sup>th</sup> percentile) |                   | 984.3 [631.1-1426.9] vs. 508.8 [461.8-539.2]* |
|                                       |                                                       |                                         | MA vs. NHW (95 <sup>th</sup> percentile) |                   | 245.1 [192.7-323.9] vs. 508.8 [461.8-539.2]*  |
| Windham et al., 2010<br>(10)          | 6-8 year old girls from California and Ohio 2005-2007 | Serum PCB GM (ng/g lipid)               | AA vs. NHW                               | PCB 118           | 2.4 vs. 3.0*                                  |
|                                       |                                                       |                                         |                                          | PCB 138/158       | 3.6 vs. 4.5*                                  |
|                                       |                                                       |                                         |                                          | PCB 153           | 4.2 vs. 6.0*                                  |
|                                       |                                                       |                                         |                                          | PCB 170           | 1.0 vs. 1.4*                                  |
|                                       |                                                       |                                         |                                          | PCB 180           | 2.2 vs. 3.2*                                  |
|                                       |                                                       |                                         | Latinas vs. NHW                          | PCB 118           | 2.4 vs. 3.0*                                  |
|                                       |                                                       |                                         |                                          | PCB 138/158       | 3.6 vs. 4.5*                                  |
|                                       |                                                       |                                         |                                          | PCB 153           | 4.4 vs. 6.0*                                  |
|                                       |                                                       |                                         |                                          | PCB 170           | 0.9 vs. 1.4*                                  |
|                                       |                                                       |                                         |                                          | PCB 180           | 2.1 vs. 3.2*                                  |
| <b>Organochlorine (OC) Pesticides</b> |                                                       |                                         |                                          |                   |                                               |
| <b>Reference</b>                      | <b>Population</b>                                     | <b>Assessment</b>                       | <b>Comparisons</b>                       | <b>Pollutants</b> | <b>Differences</b>                            |
| Krieger et al. 1994 (2)               | Women from the Northern California Region Kaiser      | Adjusted mean difference (ppb) [95% CI] | AA vs. NHW                               | DDE               | 13.2 [5.6, 20.9]*                             |
|                                       |                                                       |                                         | AA vs. NHW (Breast Cancer patients)      |                   | 15.5 [4.0, 26.9]*                             |

SUPPLEMENTARY DATA

|                          |                                                                             |                                              |                                                        |                      |                             |
|--------------------------|-----------------------------------------------------------------------------|----------------------------------------------|--------------------------------------------------------|----------------------|-----------------------------|
|                          | Permanente Medical Care Program, 1964-1971                                  |                                              | AA vs. NHW (Control patients)                          |                      | 11.6 [1.4, 21.8]**          |
| Davies et al., 1969 (11) | Dade County, FL, study population, 1965-1967                                | Mean adipose (ppm) and whole blood (ppb) DDE | DDE                                                    | AA vs. NHW (adipose) | 10.8 vs. 5.5*               |
|                          |                                                                             |                                              |                                                        | AA vs. NHW (serum)   | 16 vs. 8*                   |
| Davies et al., 1972 (12) | Dade County, FL, residents, 1970-1971                                       | Mean [SD] serum DDT and DDE (ppb)            | Lowest Social Classes vs. Highest Social Classes (AA)  | DDT                  | 10.4 vs. 8.0*               |
|                          |                                                                             |                                              | Lowest Social Classes vs. Highest Social Classes (NHW) |                      | 7.4 vs. 5.1*                |
|                          |                                                                             |                                              | AA vs. NHW (Highest Social Class)                      |                      | 7.7 [2.6] vs. 5 [2.7] ‡     |
|                          |                                                                             |                                              | AA vs. NHW (Lowest Social Class)                       |                      | 11.4 [7.0] vs. 7.9 [6.0] ‡  |
|                          |                                                                             |                                              | Lowest Social Classes vs. Highest Social Classes (AA)  | DDE                  | 46.8 vs. 35.3*              |
|                          |                                                                             |                                              | Lowest Social Classes vs. Highest Social Classes (NHW) |                      | 31.2 vs. 24.3*              |
|                          |                                                                             |                                              | AA vs. NHW (Highest Social Class)                      |                      | 33.1 [11.3] vs. 22.3 [10.4] |
|                          |                                                                             |                                              | AA vs. NHW (Lowest Social Class)                       |                      | 50.5 [30.1] vs. 33.9 [25.2] |
| James et al., 2002 (1)   | Pregnant Women from the Child Health and Development Study Cohort 1963-1967 | Percent difference of serum [95% CI]         | Non-White vs. White                                    | <i>p,p'</i> -DDE     | 53.4 [38.3-70.8]†*          |
|                          |                                                                             |                                              |                                                        | <i>o,p'</i> -DDT     | 24.5 [6.53-44.2]†*          |
|                          |                                                                             |                                              |                                                        | <i>p,p'</i> -DDT     | 48.0 [32.9-64.2]†*          |
|                          |                                                                             |                                              |                                                        | sum DDTs             | 53.5 [38.6-69.9]†*          |

SUPPLEMENTARY DATA

|                          |                                                                                                                        |                                                                                     |                     |                        |                                                 |
|--------------------------|------------------------------------------------------------------------------------------------------------------------|-------------------------------------------------------------------------------------|---------------------|------------------------|-------------------------------------------------|
| Lordo et al. 1996 (4)    | National Human Adipose Tissue Survey 1986                                                                              | Average adipose concentrations (ng/g) [RSE]                                         | Non-White vs. White | pp'-DDT                | 301 [25] vs. 152 [15]                           |
|                          |                                                                                                                        |                                                                                     |                     | pp'-DDE                | 2780 [25] vs. 2250 [13]                         |
|                          |                                                                                                                        |                                                                                     |                     | β-HCB                  | 212 [32] vs. 146 [21]                           |
|                          |                                                                                                                        |                                                                                     |                     | Heptachlor epoxide     | 51.6 [19] vs. 58.8 [8]                          |
|                          |                                                                                                                        |                                                                                     |                     | Oxychlorane            | 103 [22] vs. 116 [8]                            |
|                          |                                                                                                                        |                                                                                     |                     | trans-nonachlor        | 131 [32] vs. 130 [14]                           |
|                          |                                                                                                                        |                                                                                     |                     | Dieldrin               | 54.1 [41] vs. 45.6 [21]                         |
| Wang et al., 2009 (5)    | Pregnant women in NHANES 1999-2002                                                                                     | GM for serum lipid adjusted pesticides [95% CI]                                     | AA vs. NHW          | β-HCH (ng/g)           | 7.3 [6.5–8.3] vs. 6.7 [6.2–7.2]                 |
|                          |                                                                                                                        |                                                                                     |                     | p,p'-DDE (ng/g)        | 311.6 [253.2–383.4] vs. 177.2 [156.7–200.3]*    |
|                          |                                                                                                                        |                                                                                     |                     | trans-nonachlor (ng/g) | 18.2 [16–20.8] vs. 13.9 [12.7–15.2]*            |
|                          |                                                                                                                        |                                                                                     | MA vs. NHW          | β-HCH (ng/g)           | 19 [16–22.5] vs. 6.7 [6.2–7.2]*                 |
|                          |                                                                                                                        |                                                                                     |                     | p,p'-DDE (ng/g)        | 806.8 [674.6–964.8] vs. 177.2 [156.7–200.3]*    |
|                          |                                                                                                                        |                                                                                     |                     | trans-nonachlor (ng/g) | 14.8 [13.2–16.7] vs. 13.9 [12.7–15.2]           |
| Harley et al., 2008 (13) | Pregnant women in the Center for the Health Assessment of Mothers and Children of Salinas (CHAMACOS) cohort, 1999-2000 | GM (ng/g lipid) [range] for CHAMACOS cohort, Median (ng/g lipid) [range] for NHANES | CHAMACOS vs. NHANES | p,p'-DDE               | 1,500 [49 - 159,303] vs. 210.5 [5.4 - 17,900] ‡ |
|                          |                                                                                                                        |                                                                                     | CHAMACOS vs. NHANES | p,p'-DDT               | 24 [2 - 33,174] vs. 6.8 [3.3 - 1,070] ‡         |
|                          |                                                                                                                        |                                                                                     | CHAMACOS vs. NHANES | o,p'-DDT               | 2 [0.1 - 1,878] vs. <LOD‡                       |

SUPPLEMENTARY DATA

|                            |                                                       |                                                |                     |                                            |                                                  |
|----------------------------|-------------------------------------------------------|------------------------------------------------|---------------------|--------------------------------------------|--------------------------------------------------|
| Bradman et al., 2007 (14)  | Pregnant women in the CHAMACOS cohort, 1999-2000      | Median serum pesticides (ng/g lipid)           | CHAMACOS vs. NHANES | HCB                                        | 64.9 vs. <LOD‡                                   |
|                            |                                                       |                                                | CHAMACOS vs. NHANES | β-HCH                                      | 36.9 vs. 5‡                                      |
| Windham et al., 2010 (10)  | 6-8 year old girls from California and Ohio 2005-2007 | GM (ng/g lipid)                                | AA vs. NHW          | HCB                                        | 6.6 vs. 7.8*                                     |
|                            |                                                       |                                                | Latinas vs. NHW     |                                            | 7.8 vs. 7.8                                      |
|                            |                                                       |                                                | AA vs. NHW          | <i>trans</i> -nonachlor                    | 3.4 vs. 4.7*                                     |
|                            |                                                       |                                                | Latinas vs. NHW     |                                            | 4.3 vs. 4.7                                      |
|                            |                                                       |                                                | AA vs. NHW          | p,p-DDE                                    | 69.1 vs. 72.1                                    |
|                            |                                                       |                                                | Latinas vs. NHW     |                                            | 110.7 vs. 72.1*                                  |
| Patterson et al., 2009 (9) | NHANES 2003-2004                                      | LSGM of serum pesticides (ng/g lipid) [95% CI] | AA vs. NHW          | HCB                                        | 14.8 [14.3-15.3] vs. 15.0 [14.2-15.8]            |
|                            |                                                       |                                                | MA vs. NHW          |                                            | 17.2 [15.9-18.6] vs. 15.0 [14.2-15.8]*           |
|                            |                                                       |                                                | AA vs. NHW          | GM of pp'-DDE                              | 262.4 [233.38-294.98] vs. 208.2 [165.00-262.54]  |
|                            |                                                       |                                                | MA vs. NHW          |                                            | 444.2 [361.72-545.43] vs. 208.2 [165.00-262.54]* |
|                            |                                                       |                                                | AA vs. NHW          | β-HCH at the 75 <sup>th</sup> percentile   | 9.60 [8.30-11.90] vs. 12.80 [10.90-14.70]        |
|                            |                                                       |                                                | MA vs. NHW          |                                            | 23.50 [17.50-29.90] vs. 12.80 [10.90-14.70]*     |
|                            |                                                       |                                                | AA vs. NHW          | pp'-DDT at the 90 <sup>th</sup> percentile | 17.50 [14.80-25.40] vs. 9.70 [8.50-11.20]*       |
|                            |                                                       |                                                | MA vs. NHW          |                                            | 24.00 [18.50-33.30]                              |



SUPPLEMENTARY DATA

|                                        |                                                                             |                                                                                              | AA vs. NHW      | pp'-DDT at the 95 <sup>th</sup> percentile | vs. 9.70[8.50-11.20]*                           |
|----------------------------------------|-----------------------------------------------------------------------------|----------------------------------------------------------------------------------------------|-----------------|--------------------------------------------|-------------------------------------------------|
|                                        |                                                                             |                                                                                              | MA vs. NHW      |                                            | 30.70 [19.00-53.40]<br>vs. 12.90 [10.70-16.60]  |
|                                        |                                                                             |                                                                                              | AA vs. NHW      | GM of <i>trans</i> -nonachlor              | 48.60 [31.00-71.10]<br>vs. 12.90 [10.70-16.60]* |
|                                        |                                                                             |                                                                                              | MA vs. NHW      |                                            | 14.4 [12.24-16.98] vs. 15.8 [13.72-18.21]       |
|                                        |                                                                             |                                                                                              |                 |                                            | 10.2 [7.68 - 13.24] vs. 15.8 [13.72-18.21]*     |
| Chemical Constituents of Air Pollution |                                                                             |                                                                                              |                 |                                            |                                                 |
| Reference                              | Population                                                                  | Assessment                                                                                   | Comparisons     | Pollutants                                 | Differences                                     |
| Bell and Ebisu, 2012 (15)              | 215 U.S. Census tracts from 2000-2006                                       | Percent increase in long-term average exposure per an additional 10% increase in demographic | AA              | PM <sub>2.5</sub>                          | 1.88*                                           |
|                                        |                                                                             |                                                                                              | Latino          |                                            | 0.13                                            |
|                                        |                                                                             |                                                                                              | NHW             |                                            | -1.37*                                          |
| Jones et al. 2014 (16)                 | 5921 participants from the Multi-Ethnic Study of Atherosclerosis, 2000-2002 | Ambient GM for PM <sub>2.5</sub> (µg/m <sup>3</sup> ), and NOx (ppb)                         | AA vs. NHW      | PM <sub>2.5</sub>                          | 16.5 [16.4, 16.6] vs. 15.7 [15.6, 15.8]*        |
|                                        |                                                                             |                                                                                              | Latinos vs. NHW |                                            | 16.9 [16.8, 17.1] vs. 15.7 [15.6, 15.8]*        |
|                                        |                                                                             |                                                                                              | AA vs. NHW      | NOx                                        | 43.3 [42.2, 44.4] vs. 33.6 [33.0, 34.4]*        |
|                                        |                                                                             |                                                                                              | Latinos vs. NHW |                                            | 58.7 [57.1, 60.4] vs. 33.6 [33.0, 34.4]*        |
| Schweitzer and Zhou, 2010 (17)         | 80 metropolitan areas in the U.S.                                           | Coefficient of total exposure: Log (µ x p x e +1); µ =                                       | % AA            | PM <sub>2.5</sub>                          | 3.82*                                           |
|                                        |                                                                             |                                                                                              | % Latino        |                                            | 0.23                                            |

SUPPLEMENTARY DATA

|                          |                                                                                            |                                                                                                                                                                                       |                                                       |                          |                                        |
|--------------------------|--------------------------------------------------------------------------------------------|---------------------------------------------------------------------------------------------------------------------------------------------------------------------------------------|-------------------------------------------------------|--------------------------|----------------------------------------|
|                          |                                                                                            | concentration at pollution monitor, $p$ = population living within ½ mile of monitor, $e$ = total number of days monitor reported levels higher than federal standards from 2001-2003 | %Poverty                                              | Ozone                    | 8.85*                                  |
|                          |                                                                                            |                                                                                                                                                                                       | % AA                                                  |                          | 2.37*                                  |
|                          |                                                                                            |                                                                                                                                                                                       | % Latino                                              |                          | 0.02                                   |
|                          |                                                                                            |                                                                                                                                                                                       | % Poverty                                             |                          | 1.77*                                  |
| Miranda et al. 2011 (18) | U.S. Census demographics from 2000, air quality data from 587 U.S. counties from 2005-2007 | Odds Ratio for a county being in the worst 20% vs. best 20% of counties for each pollution metric per increase in IQR for each demographic across all U.S. counties                   | % AA                                                  | Annual PM <sub>2.5</sub> | 2.73*                                  |
|                          |                                                                                            |                                                                                                                                                                                       | % Latino                                              |                          | 0.83                                   |
|                          |                                                                                            |                                                                                                                                                                                       | % Living in Poverty                                   |                          | 3.95*                                  |
|                          |                                                                                            |                                                                                                                                                                                       | % AA                                                  | Daily PM <sub>2.5</sub>  | 1.58*                                  |
|                          |                                                                                            |                                                                                                                                                                                       | % Latino                                              |                          | 1.13                                   |
|                          |                                                                                            |                                                                                                                                                                                       | % Living in Poverty                                   |                          | 1.92*                                  |
| Clark et al. 2014 (19)   | U.S. population demographics from 2000, air pollution data from 2006                       | Population-weighted mean (ppb)                                                                                                                                                        | Non-White vs. White                                   | NO <sub>2</sub>          | 14.5 vs. 9.9, 38% Relative Difference* |
|                          |                                                                                            |                                                                                                                                                                                       | AA vs. NHW                                            |                          | 13.3 vs. 9.9                           |
|                          |                                                                                            |                                                                                                                                                                                       | Latinos vs. NHW                                       |                          | 15.6 vs. 9.9                           |
|                          |                                                                                            |                                                                                                                                                                                       | Non-White vs. White (children below the poverty line) |                          | 14.3 vs. 9.1                           |

SUPPLEMENTARY DATA

|                              |                                                 |                                                    | Non-White vs. White<br>(elderly below the<br>poverty line)                   |            | 14.5 vs. 9.9                                                                                                                          |
|------------------------------|-------------------------------------------------|----------------------------------------------------|------------------------------------------------------------------------------|------------|---------------------------------------------------------------------------------------------------------------------------------------|
| <b>Bisphenol A (BPA)</b>     |                                                 |                                                    |                                                                              |            |                                                                                                                                       |
| Reference                    | Population                                      | Assessment                                         | Comparisons                                                                  | Pollutants | Differences                                                                                                                           |
| Calafat et al., 2008 (20)    | NHANES 2003-2004                                | Adjusted LSGM [95% CI] of Total urinary BPA (µg/L) | Income <\$20,000 vs. >\$45,000                                               | BPA        | 3.1 [2.7–3.5] vs. 2.5 [2.3–2.7]*                                                                                                      |
| LaKind and Naiman, 2011 (21) | NHANES 2005-2006                                | Total urinary BPA (ng/mL)                          | AA vs. NHW                                                                   | BPA        | Higher urinary BPA levels in AA than NHW, (Wilcoxon test, P< 0.00001); Note: Original article does not provide urinary concentrations |
| Nelson et al., 2012 (22)     | NHANES 2003-2006                                | Total urinary median BPA (µg/g creatinine)         | Emergency food assistance vs. no food assistance (Children, 6-11 years olds) | BPA        | Percent change 54 [13 to 112]*                                                                                                        |
|                              |                                                 |                                                    | Lowest family Income vs. highest family income                               |            | 2.5 vs. 1.8 µg/g; Percent Change: 22.8 [10.6, 36.4]*                                                                                  |
|                              |                                                 |                                                    | Very low food security vs. full food security                                |            | 2.6 vs. 2.0 µg/g; Percent change: 19.6 [5.6, 35.5]*                                                                                   |
|                              |                                                 |                                                    | AA vs. NHW                                                                   |            | 2.2 vs. 2.2 µg/g                                                                                                                      |
|                              |                                                 |                                                    | MA vs. NHW                                                                   |            | 1.9 vs. 2.2 µg/g                                                                                                                      |
| Unal et al., 2012 (23)       | South Carolina Pilot Study of 27 pregnant women | Total serum median [range] BPA (ng/mL)             | AA vs. NHW                                                                   | BPA        | 30.13 [0–134.8] vs. 3.14 [0–37.1]*                                                                                                    |
|                              |                                                 |                                                    | Latinas vs. NHW                                                              |            | 24.46 [0.2–153.5] vs. 3.14 [0–37.1]                                                                                                   |
|                              |                                                 |                                                    | Unemployed vs. Employed                                                      |            | 41 [8.55–153] vs. 7.45 [0–43.7]†*                                                                                                     |
| <b>Phthalates</b>            |                                                 |                                                    |                                                                              |            |                                                                                                                                       |

SUPPLEMENTARY DATA

| Reference                  | Population                               | Assessment                                                                            | Comparisons                                       | Pollutants                      | Differences                                                  |
|----------------------------|------------------------------------------|---------------------------------------------------------------------------------------|---------------------------------------------------|---------------------------------|--------------------------------------------------------------|
| Koo et al., 2002 (24)      | NHANES 1988-1994                         | Relation between the log of exposure estimates for phthalates and demographic factors | Monthly family income <\$1,500 vs. ≥\$1,500       | BBP                             | 0.23*                                                        |
|                            |                                          |                                                                                       | Monthly family income <\$1,500 vs. ≥\$1,500       | DEHP                            | 0.68*                                                        |
| Silva et al., 2004 (25)    | NHANES 1999-2000                         | LSGM of urinary phthalates (µg/L)                                                     | AA vs. NHW                                        | MEP                             | 237.8 vs. 162.1*                                             |
|                            |                                          |                                                                                       | MA vs. NHW                                        |                                 | 191.9 vs. 162.1                                              |
|                            |                                          |                                                                                       | AA vs. NHW                                        | MBzP                            | 14.7 vs. 15.5                                                |
|                            |                                          |                                                                                       | MA vs. NHW                                        |                                 | 13.1 vs. 15.5*                                               |
| Branch et al., 2015 (26)   | 2001-2004 NHANES, (20-49 year old women) | GM [GSE] of urinary phthalates (ng/mL); percent change [95% CI]                       | AA vs. NHW                                        | MEP                             | 268 [26.5] vs. 127 [10.7]; Percent change: 48.4 [16.8-88.6]* |
|                            |                                          |                                                                                       | MA vs. NHW                                        |                                 | 247 [26.1] vs. 127 [10.7]; Percent change: 58 [24.7-100.8]*  |
|                            |                                          |                                                                                       | AA vs. NHW                                        | MnBP                            | 32.3 [2.0] vs. 18.2 [1.0] §                                  |
|                            |                                          |                                                                                       | MA vs. NHW                                        |                                 | 23.7 [2.3] vs. 18.2 [1.0] §                                  |
| Trasande et al., 2013 (27) | 2003-2008 NHANES, (12-19 years old)      | Mean urinary phthalates (µM)                                                          | AA vs. NHW                                        | Low molecular weight phthalates | 1.010 vs. 0.662*                                             |
|                            |                                          |                                                                                       | MA vs. NHW                                        |                                 | 0.891 vs. 0.662*                                             |
|                            |                                          |                                                                                       | First PIR quartile (poor) vs. fourth PIR quartile |                                 | 0.982 vs. 0.727*                                             |
| Kobrosly et al., 2012 (28) | NHANES 2001-2008, (20-39 year old women) | Multiplicative differences in urinary phthalate levels [95%                           | Non-white vs. white                               | DBP molar sum                   | 1.26 [1.12-1.40]*                                            |
|                            |                                          |                                                                                       | Income-to-poverty ratio 0-1 (most poor) vs. 4-5   |                                 | 1.16 [1.03-1.32]*                                            |
|                            |                                          |                                                                                       | Non-white vs. white                               | MEP                             | 1.44 [1.24-1.68]*                                            |
|                            |                                          |                                                                                       | Income-to-poverty ratio                           | MBzP                            | 1.62 [1.37-1.91]*                                            |

SUPPLEMENTARY DATA

|  |  |     |                                               |               |                                                                          |
|--|--|-----|-----------------------------------------------|---------------|--------------------------------------------------------------------------|
|  |  | CI] | 0-1 (most poor) vs. 4-5                       |               |                                                                          |
|  |  |     | Food Security (Full, Marginal, Low, Very Low) | DBP molar sum | 1 (ref), 1.07 [0.87, 1.31], 1.19 [0.97, 1.46], 1.30 [0.98, 1.73]; Trend* |
|  |  |     |                                               | MBzP          | 1 (ref), 1.14 [0.97, 1.35], 1.17 [0.95, 1.45] 1.24 [0.98, 1.56]; Trend*  |

## SUPPLEMENTARY DATA

### References for Supplementary Table 1

1. James RA, Hertz-Picciotto I, William E, Keller JA, Charles MJ. Determinants of Serum Polychlorinated Biphenyls and Organochlorine Pesticides Measured in Women from the Child Health and Development Study Cohort, 1963–1967. *Environ Health Perspect.* 2002;110(7):617-24.
2. Krieger N, Wolff MS, Hiatt RA, Rivera M, Vogelmann J, Orentreich N. Breast cancer and serum organochlorines: a prospective study among white, black, and Asian women. *JNCI: Journal of the National Cancer Institute.* 1994;86(8):589-99.
3. Weintraub M, Birnbaum LS. Catfish consumption as a contributor to elevated PCB levels in a non-Hispanic black subpopulation. *Environ Res.* 2008;107(3):412-7.
4. Lordo RA, Dinh KT, Schwemberger JG. Semivolatile organic compounds in adipose tissue: estimated averages for the US population and selected subpopulations. *American journal of public health.* 1996;86(9):1253-9.
5. Wang RY, Jain RB, Wolkin AF, Rubin CH, Needham LL. Serum concentrations of selected persistent organic pollutants in a sample of pregnant females and changes in their concentrations during gestation. *Environ Health Perspect.* 2009;117(8):1244-9.
6. Bouchard MF, Oulhote Y, Sagiv SK, Saint-Amour D, Weuve J. Polychlorinated biphenyl exposures and cognition in older U.S. adults: NHANES (1999-2002). *Environ Health Perspect.* 2014;122(1):73-8.
7. Xue J, Liu SV, Zartarian VG, Geller AM, Schultz BD. Analysis of NHANES measured blood PCBs in the general US population and application of SHEDS model to identify key exposure factors. *J Expo Sci Environ Epidemiol.* 2014;24(6):615-21.
8. Sjodin A, Jones RS, Caudill SP, Wong LY, Turner WE, Calafat AM. Polybrominated diphenyl ethers, polychlorinated biphenyls, and persistent pesticides in serum from the national health and nutrition examination survey: 2003-2008. *Environ Sci Technol.* 2014;48(1):753-60.
9. Patterson J, Donald G, Wong L-Y, Turner WE, Caudill SP, DiPietro ES, McClure PC, et al. Levels in the US population of those persistent organic pollutants (2003– 2004) included in the Stockholm Convention or in other long-range transboundary air pollution agreements. *Environmental science & technology.* 2009;43(4):1211-8.
10. Windham GC, Pinney SM, Sjodin A, Lum R, Jones RS, Needham LL, et al. Body burdens of brominated flame retardants and other persistent organo-halogenated compounds and their descriptors in US girls. *Environmental research.* 2010;110(3):251-7.
11. Davies JE, Edmundson WF, Maceo A, Barquet A, Cassady J. An epidemiologic application of the study of DDE levels in whole blood. *American Journal of Public Health and the Nations Health.* 1969;59(3):435-41.
12. Davies JE, Edmundson WF, Raffonelli A, Cassady JC, Morgade C. The role of social class in human pesticide pollution. *American journal of epidemiology.* 1972;96(5):334-41.
13. Harley KG, Marks AR, Bradman A, Barr DB, Eskenazi B. DDT exposure, work in agriculture, and time to pregnancy among farmworkers in California. *Journal of occupational and environmental medicine/American College of Occupational and Environmental Medicine.* 2008;50(12):1335.
14. Bradman A, Schwartz JM, Fenster L, Barr DB, Holland NT, Eskenazi B. Factors predicting organochlorine pesticide levels in pregnant Latina women living in a United States agricultural area. *Journal of Exposure Science and Environmental Epidemiology.* 2007;17(4):388-99.
15. Bell ML, Ebisu K. Environmental Inequality in Exposures to Airborne Particulate Matter Components in the United States. *Environmental Health Perspectives.* 2012;120(12):1699-704.
16. Jones MR, Diez-Roux AV, Hajat A, Kershaw KN, O'Neill MS, Guallar E, et al. Race/ethnicity, residential segregation, and exposure

## SUPPLEMENTARY DATA

to ambient air pollution: the Multi-Ethnic Study of Atherosclerosis (MESA). *American journal of public health*. 2014;104(11):2130-7.

17. Schweitzer L, Zhou J. Neighborhood air quality, respiratory health, and vulnerable populations in compact and sprawled regions. *Journal of the American Planning Association*. 2010;76(3):363-71.

18. Miranda ML, Edwards SE, Keating MH, Paul CJ. Making the environmental justice grade: the relative burden of air pollution exposure in the United States. *International journal of environmental research and public health*. 2011;8(6):1755-71.

19. Clark LP, Millet DB, Marshall JD. National patterns in environmental injustice and inequality: outdoor NO<sub>2</sub> air pollution in the United States. *PloS one*. 2014;9(4):e94431.

20. Calafat AM, Ye X, Wong LY, Reidy JA, Needham LL. Exposure of the U.S. population to bisphenol A and 4-tertiary-octylphenol: 2003-2004. *Environ Health Perspect*. 2008;116(1):39-44.

21. LaKind JS, Naiman DQ. Daily intake of bisphenol A and potential sources of exposure: 2005–2006 National Health and Nutrition Examination Survey. *Journal of Exposure Science & Environmental Epidemiology*. 2011;21(3):272-9.

22. Nelson JW, Scammell MK, Hatch EE, Webster TF. Social disparities in exposures to bisphenol A and polyfluoroalkyl chemicals: a cross-sectional study within NHANES 2003-2006. *Environ Health*. 2012;11:10.

23. Unal ER, Lynn T, Neidich J, Salazar D, Goetzl L, Baatz JE, et al. Racial disparity in maternal and fetal-cord bisphenol A concentrations. *J Perinatol*. 2012;32(11):844-50.

24. Koo J-W, Parham F, Kohn MC, Masten SA, Brock JW, Needham LL, et al. The association between biomarker-based exposure estimates for phthalates and demographic factors in a human reference population. *Environmental Health Perspectives*. 2002;110(4):405-10.

25. Silva MJ, Barr DB, Reidy JA, Malek NA, Hodge CC, Caudill SP, et al. Urinary levels of seven phthalate metabolites in the U.S. population from the National Health and Nutrition Examination Survey (NHANES) 1999-2000. *Environ Health Perspect*. 2004;112(3):331-8.

26. Branch F, Woodruff TJ, Mitro SD, Zota AR. Vaginal douching and racial/ethnic disparities in phthalates exposures among reproductive-aged women: National Health and Nutrition Examination Survey 2001-2004. *Environ Health*. 2015;14:57.

27. Trasande L, Spanier AJ, Sathyanarayana S, Attina TM, Blustein J. Urinary phthalates and increased insulin resistance in adolescents. *Pediatrics*. 2013;132(3):e646-55.

28. Kobrosly RW, Parlett LE, Stahlhut RW, Barrett ES, Swan SH. Socioeconomic factors and phthalate metabolite concentrations among United States women of reproductive age. *Environmental Research*. 2012;115(0):11-7.

SUPPLEMENTARY DATA

**Supplementary Table 2.** Representative animal and cellular studies linking endocrine disrupting chemicals (EDCs) with metabolic dysfunction.

| <b>Metabolic Alteration</b>                                                                     | <b>Polychlorinated Biphenyls (PCBs)</b> | <b>Organochlorine (OC) Pesticides</b> | <b>Chemicals Constituents of Air Pollution</b> | <b>Bisphenol A (BPA)</b> | <b>Phthalates</b> |
|-------------------------------------------------------------------------------------------------|-----------------------------------------|---------------------------------------|------------------------------------------------|--------------------------|-------------------|
| Weight Gain and/or Increased Adiposity                                                          | (1)                                     | (2)                                   | (3, 4)                                         | (5)                      | (6)               |
| Glucose Intolerance                                                                             | (7)                                     | (2)                                   |                                                | (8)                      | (9)               |
| Systemic and/or Cellular Insulin Resistance or Hyperinsulinemia                                 | (7)                                     | (2)                                   | (10)                                           | (8, 11, 12)              | (13, 14)          |
| Altered $\beta$ -cell Function, Reduced $\beta$ -cell Mass, or Increased Insulinitis            | (15)                                    | (16)                                  |                                                | (12, 17, 18)             | (9)               |
| Altered Hepatic Gene Expression, Lipid Handling, and Steatosis                                  | (19, 20)                                | (20)                                  | (4)                                            | (21)                     | (22)              |
| Altered Adipocyte Differentiation and Adipose Gene Expression, including Inflammatory Mediators | (1)                                     | (23)                                  | (10)                                           | (11, 24, 25)             | (6)               |
| Alterations $\alpha$ -cell Signaling                                                            |                                         |                                       |                                                | (26)                     |                   |



## SUPPLEMENTARY DATA

### References for Supplementary Table 1

1. Arsenescu V, Arsenescu RI, King V, Swanson H, Cassis LA. Polychlorinated biphenyl-77 induces adipocyte differentiation and proinflammatory adipokines and promotes obesity and atherosclerosis. *Environ Health Perspect.* 2008;116(6):761-8.
2. La Merrill M, Karey E, Moshier E, Lindtner C, La Frano MR, Newman JW, et al. Perinatal exposure of mice to the pesticide DDT impairs energy expenditure and metabolism in adult female offspring. *PloS one.* 2014;9(7):e103337.
3. Weldy CS, Liu Y, Liggitt HD, Chin MT. In utero exposure to diesel exhaust air pollution promotes adverse intrauterine conditions, resulting in weight gain, altered blood pressure, and increased susceptibility to heart failure in adult mice. *PloS one.* 2014;9(2):e88582.
4. Ortiz L, Nakamura B, Li X, Blumberg B, Luderer U. In utero exposure to benzo[a]pyrene increases adiposity and causes hepatic steatosis in female mice, and glutathione deficiency is protective. *Toxicology letters.* 2013;223(2):260-7.
5. Miyawaki J, Sakayama K, Kato H, Yamamoto H, Masuno H. Perinatal and postnatal exposure to bisphenol a increases adipose tissue mass and serum cholesterol level in mice. *J Atheroscler Thromb.* 2007;14(5):245-52.
6. Hao C, Cheng X, Xia H, Ma X. The endocrine disruptor mono-(2-ethylhexyl) phthalate promotes adipocyte differentiation and induces obesity in mice. *Biosci Rep.* 2012;32(6):619-29.
7. Baker NA, Karounos M, English V, Fang J, Wei Y, Stromberg A, et al. Coplanar polychlorinated biphenyls impair glucose homeostasis in lean C57BL/6 mice and mitigate beneficial effects of weight loss on glucose homeostasis in obese mice. *Environ Health Perspect.* 2013;121(1):105-10.
8. Moon MK, Jeong IK, Jung Oh T, Ahn HY, Kim HH, Park YJ, et al. Long-term oral exposure to bisphenol A induces glucose intolerance and insulin resistance. *The Journal of endocrinology.* 2015;226(1):35-42.
9. Lin Y, Wei J, Li Y, Chen J, Zhou Z, Song L, et al. Developmental exposure to di(2-ethylhexyl) phthalate impairs endocrine pancreas and leads to long-term adverse effects on glucose homeostasis in the rat. *American journal of physiology Endocrinology and metabolism.* 2011;301(3):E527-38.
10. Sun Q, Yue P, Deiuliis JA, Lumeng CN, Kampfrath T, Mikolaj MB, et al. Ambient air pollution exaggerates adipose inflammation and insulin resistance in a mouse model of diet-induced obesity. *Circulation.* 2009;119(4):538-46.
11. Valentino R, D'Esposito V, Passaretti F, Liotti A, Cabaro S, Longo M, et al. Bisphenol-A impairs insulin action and up-regulates inflammatory pathways in human subcutaneous adipocytes and 3T3-L1 cells. *PloS one.* 2013;8(12):e82099.
12. Alonso-Magdalena P, Morimoto S, Ripoll C, Fuentes E, Nadal A. The estrogenic effect of bisphenol A disrupts pancreatic beta-cell function in vivo and induces insulin resistance. *Environ Health Perspect.* 2006;114(1):106-12.
13. Rajesh P, Sathish S, Srinivasan C, Selvaraj J, Balasubramanian K. Phthalate is associated with insulin resistance in adipose tissue of male rat: role of antioxidant vitamins. *J Cell Biochem.* 2013;114(3):558-69.
14. Rajesh P, Balasubramanian K. Di(2-ethylhexyl)phthalate exposure impairs insulin receptor and glucose transporter 4 gene expression in L6 myotubes. *Hum Exp Toxicol.* 2014;33(7):685-700.
15. Fischer LJ, Zhou HR, Wagner MA. Polychlorinated biphenyls release insulin from RINm5F cells. *Life Sci.* 1996;59(24):2041-9.
16. Yau DT, Mennear JH. The inhibitory effect of DDT on insulin secretion in mice. *Toxicol Appl Pharmacol.* 1977;39(1):81-8.
17. Alonso-Magdalena P, Garcia-Arevalo M, Quesada I, Nadal A. Bisphenol-A treatment during pregnancy in mice: a new window of susceptibility for the development of diabetes in mothers later in life. *Endocrinology.* 2015;156(5):1659-70.
18. Bodin J, Bolling AK, Becher R, Kuper F, Lovik M, Nygaard UC. Transmaternal bisphenol A exposure accelerates diabetes type 1

## SUPPLEMENTARY DATA

development in NOD mice. *Toxicol Sci.* 2014;137(2):311-23.

19. Wahlang B, Song M, Beier JI, Cameron Falkner K, Al-Eryani L, Clair HB, et al. Evaluation of Aroclor 1260 exposure in a mouse model of diet-induced obesity and non-alcoholic fatty liver disease. *Toxicol Appl Pharmacol.* 2014;279(3):380-90.

20. Mulligan C, Kondakala S, Yang EJ, Stokes JV, Stewart JA, Kaplan BL, et al. Exposure to an environmentally relevant mixture of organochlorine compounds and polychlorinated biphenyls Promotes hepatic steatosis in male Ob/Ob mice. *Environ Toxicol.* 2017;32(4):1399-411.

21. Wei J, Sun X, Chen Y, Li Y, Song L, Zhou Z, et al. Perinatal exposure to bisphenol A exacerbates nonalcoholic steatohepatitis-like phenotype in male rat offspring fed on a high-fat diet. *The Journal of endocrinology.* 2014;222(3):313-25.

22. Maranghi F, Lorenzetti S, Tassinari R, Moracci G, Tassinari V, Marcoccia D, et al. In utero exposure to di-(2-ethylhexyl) phthalate affects liver morphology and metabolism in post-natal CD-1 mice. *Reprod Toxicol.* 2010;29(4):427-32.

23. Mangum LH, Howell GE, 3rd, Chambers JE. Exposure to p,p'-DDE enhances differentiation of 3T3-L1 preadipocytes in a model of sub-optimal differentiation. *Toxicology letters.* 2015;238(2):65-71.

24. Somm E, Schwitzgebel VM, Toulotte A, Cederroth CR, Combescure C, Nef S, et al. Perinatal exposure to bisphenol a alters early adipogenesis in the rat. *Environ Health Perspect.* 2009;117(10):1549-55.

25. Hugo ER, Brandebourg TD, Woo JG, Loftus J, Alexander JW, Ben-Jonathan N. Bisphenol A at environmentally relevant doses inhibits adiponectin release from human adipose tissue explants and adipocytes. *Environ Health Perspect.* 2008;116(12):1642-7.

26. Alonso-Magdalena P, Laribi O, Ropero AB, Fuentes E, Ripoll C, Soria B, et al. Low doses of bisphenol A and diethylstilbestrol impair Ca<sup>2+</sup> signals in pancreatic alpha-cells through a nonclassical membrane estrogen receptor within intact islets of Langerhans. *Environ Health Perspect.* 2005;113(8):969-77.

SUPPLEMENTARY DATA

**Supplementary Figure 1.** Geographic location of studies linking exposure to endocrine disrupting chemicals (EDCs) with diabetes (from **Table 1**) as well as studies documenting racial, ethnic, and socioeconomic disparities in exposures to diabetogenic EDCs (from **Supplemental Table 1**).

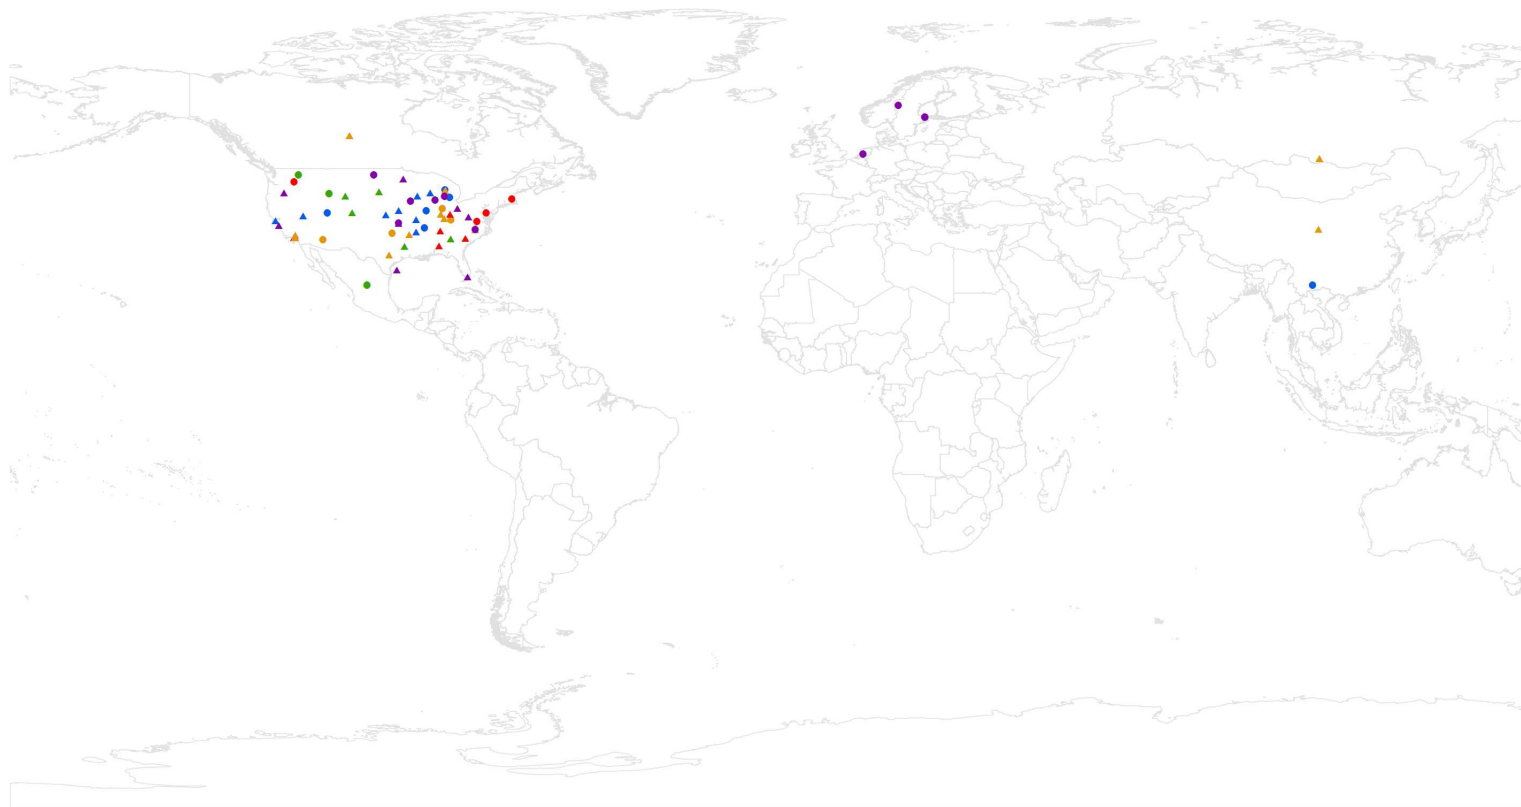

**EDC Exposures and Diabetes Risk**

- BPA
- Chemical Constituents of Air Pollution
- Organochlorine (OC) Pesticides
- Polychlorinated Biphenyls (PCBs)
- Phthalates

**Disparities in EDC Exposures**

- ▲ BPA
- ▲ Chemical Constituents of Air Pollution
- ▲ Organochlorine (OC) Pesticides
- ▲ Polychlorinated Biphenyls (PCBs)
- ▲ Phthalates

## SUPPLEMENTARY DATA

### **Healthcare Provider Guide: Strategies for Reducing Environmental Exposures Linked to Diabetes**

This Guide was developed based upon interpretation of the current scientific literature. The intent of this document is to assist healthcare practitioners in providing guidance to their patients who seek to take a precautionary approach with regard to their environmental exposures as one component of a comprehensive, individualized diabetes treatment plan. While the chemicals discussed in this Guide have been linked to diabetes, research is ongoing regarding the human health effects arising from these exposures.

#### **Polychlorinated Biphenyls (PCBs)**

***What are PCBs?*** PCBs are a class of 209 synthetic chemicals introduced in the U.S. in the 1930s. Based on their unique chemical properties, PCBs were used in electrical, heat transfer, and hydraulic equipment; as plasticizers in paints, plastics, and rubber products; as pigments and dyes; and for a variety of other industrial purposes. PCBs were banned by the U.S. Environmental Protection Agency in 1977; however, they remain detectable in human tissues due to their environmental and biological persistence.

#### ***What are sources of exposure to PCBs?***

1. Contaminated fish, meat, and dairy products, including bottom-feeding freshwater fish that consume PCB-laden sediment
2. Dusts contaminated with low levels of PCBs coating the surfaces of fruits and vegetables
3. Contaminated drinking water arising from PCB leaching from toxic waste sites or old submersible pumps containing PCBs
4. Older fluorescent lights with transformers or ballasts containing PCBs
5. Deterioration of old building materials, including paints and caulking

#### **Air Pollution**

***What is air pollution?*** Air pollution is a diverse mixture of natural and human-made airborne substances that arise from outdoor and indoor sources. These substances include fine particles, noxious gases, ground level ozone, tobacco smoke, mold, pollen, building materials, and household products and chemicals.

#### ***What are sources of exposure to air pollution?***

1. Burning of fossil fuels (including power plants, motorized vehicles, and lawn care equipment)
2. Chemical plants, factories, refineries, and gas stations
3. Gas appliances, paints, solvents, and household chemicals
4. Combustion of organic matter (including fireplaces, wood stoves, charcoal grills, and leaf burning)

#### **Bisphenol A (BPA)**

***What is BPA?*** BPA is a common synthetic chemical used in the production of polycarbonate and other plastics commonly used in consumer products. BPA is used to make plastics more rigid. It is also employed in the lining of food and beverage cans and thermal paper used for generating receipts. Exposure to BPA is nearly universal in the U.S. population.

#### ***What are sources of exposure to BPA?***

1. Polycarbonate plastics, including some water and baby bottles, compact discs, impact-resistant safety equipment, and medical devices
2. Epoxy resins coating food cans, bottle tops, and water supply pipes
3. Thermal paper, including sales receipts
4. Some dental sealants and composites

#### **Phthalates**

***What:*** Phthalates are a diverse class of widely used synthetic compounds. Phthalates are used to enhance the flexibility of plastics, including those composed of polyvinyl chloride (PVC). They are also used in a variety of personal care products, including fragrances, cosmetics, shampoos, and lotions. They can be found in some

## SUPPLEMENTARY DATA

plastic medical devices and some time-released medications. Phthalates are also found as contaminants of the food supply with high fat and processed foods having particularly high levels.

### **What are sources of exposure to phthalates?**

1. Plastic food and beverage containers
2. Plastic toys, shower curtains, and raincoats
3. Personal care products, such as perfumes, hair sprays, deodorants, and nail polishes
4. Most consumer products containing “fragrances”, including shampoos, air fresheners, and detergents
5. Carpeting, vinyl flooring, and plastic coatings on wires, cables, and other equipment
6. Medical devices, including IV bags and tubing as well as some extended-release medications
7. Polyvinyl chloride (PVC)-containing products
8. Contaminated food and water

## **Organochlorine (OC) Pesticides**

**What:** Organochlorine (OC) pesticides were an early generation of synthetic pesticides used extensively in the U.S. for agriculture and mosquito control. This class includes such pesticides as dieldrin, methoxychlor, and dichlorodiphenyltrichloroethane, commonly known as DDT. They were banned by the U.S. Environmental Protection Agency in the 1970s; however, their use continued in other countries for decades. Indeed, DDT is still used in a few countries for malaria control. Largely because of their environmental and biological persistence, several OC pesticides and their metabolites are still measurable in the U.S. population.

### **What are sources of exposure to OC pesticides?**

1. Some high-fat dairy products, high-fat meats, and fatty fish
2. Dust and soil from past use
3. Some shampoos used to treat lice that contain lindane
4. Exposures outside the U.S.

---

## **Data Sources and Further Reading**

### **Polychlorinated Biphenyls (PCBs)**

*United States Environmental Protection Agency*

<https://www.epa.gov/pcbs/learn-about-polychlorinated-biphenyls-pcbs>

*Illinois Department of Public Health*

<http://www.idph.state.il.us/cancer/factsheets/polychlorinatedbiphenyls.htm>

### **Air Pollution**

*American Lung Association*

<http://www.lung.org/our-initiatives/healthy-air/outdoor/air-pollution/10-tips-to-protect-yourself.html>

*National Institute of Environmental Health Sciences*

<https://www.niehs.nih.gov/health/topics/agents/air-pollution/index.cfm>

*European Respiratory Society*

<http://www.europeanlung.org/assets/files/factsheets/ten-top-tips-en.pdf>

### **Bisphenol A**

*National Toxicology Program*

[https://www.niehs.nih.gov/research/supported/assets/docs/a\\_c/bpa\\_fact\\_sheet\\_508.pdf](https://www.niehs.nih.gov/research/supported/assets/docs/a_c/bpa_fact_sheet_508.pdf)

*Pediatric Environmental Health Specialty Units*

[http://www.pehsu.net/\\_Phthalates\\_and\\_Bisphenol\\_A\\_Advisory.html](http://www.pehsu.net/_Phthalates_and_Bisphenol_A_Advisory.html)

### **Phthalates**

*Centers for Disease Control and Prevention*

[https://www.cdc.gov/biomonitoring/phthalates\\_factsheet.html](https://www.cdc.gov/biomonitoring/phthalates_factsheet.html)

*Pediatric Environmental Health Specialty Units*

[http://www.pehsu.net/\\_Phthalates\\_and\\_Bisphenol\\_A\\_Advisory.html](http://www.pehsu.net/_Phthalates_and_Bisphenol_A_Advisory.html)

### **Organochlorine (OC) Pesticides**

*California Environmental Contaminant Biomonitoring Program*

## SUPPLEMENTARY DATA

[http://biomonitoring.ca.gov/sites/default/files/downloads/OrganochlorinePesticidesFactSheet\\_0.pdf](http://biomonitoring.ca.gov/sites/default/files/downloads/OrganochlorinePesticidesFactSheet_0.pdf)

Delaware Health and Social Services

<http://dhss.delaware.gov/dph/files/organochlorpestfaq.pdf>

# Suggestions for Reducing Exposures to Chemicals Linked to Diabetes

## **Food and Water**

1. Consult local guides regarding which sport fish are safe to consume.
2. Trim fat from meat and the skin from fish and cook using a rack to allow fat to drain.
3. Wash fruits and vegetables before consuming them.
4. Don't microwave polycarbonate plastic food containers or use them for storing hot liquids.
5. Avoid plastic containers designated #3, #6, and #7.
6. Eat fresh and frozen foods while reducing consumption of canned and processed foods.
7. Opt for glass, porcelain, or stainless steel containers when possible, especially for hot food and drinks.
8. Prepare more meals at home and emphasize fresh ingredients.
9. Consider using a water filter.
10. If possible, purchase organic produce, meat, and dairy products.
11. Eat a diversified diet with plenty of variety.

## **Exercise and Activity**

1. Check air quality in your area [<https://airnow.gov>].
2. Avoid outdoor exercise when pollution levels are high.
3. Avoid exercise near high traffic areas. Instead, choose routes away from busy roads and vehicles.

## **Personal Care**

1. Read labels and avoid products containing phthalates.
2. Choose products labeled "Phthalate-Free" and "BPA-Free".
3. Avoid fragrances and opt for cosmetics labeled "no synthetic fragrance", "scented only with essential oils", or "phthalate-free".
4. Wash your hands often, especially before preparing and eating food.
5. Minimize handling of receipts and thermal paper.

## **Around the Home**

1. For those with a submersible pump in their well who notice an oily film or fuel odor in their well water, check to see if the pump has failed and, if so, replace it. Contact your local Department of Public Health for information on how to clean the well.
2. Old fluorescent bulbs and deteriorating construction materials from older buildings should be replaced and discarded safely. Contact your local Department of Public Health.
3. Don't burn wood or trash.
4. Use hand-powered or electric lawn care equipment instead of gas-powered alternatives.
5. Forbid smoking indoors and advocate for measures to make public spaces tobacco-free.
6. Clean your floors regularly and remove dust from your home with a damp cloth.
7. Plant trees, which filter out airborne gases and particulate matter.

## **For Children**

1. Avoid hand-me-down plastic toys.
2. Opt for infant formula bottles and toys that are labeled "BPA-Free".

## **Transportation**

1. Choose transportation options and transit routes that limit time sitting in traffic.
2. Encourage your child's school to reduce school bus emissions, including reducing idling.

## SUPPLEMENTARY DATA

*Disclaimer: The suggestions listed above are based upon limited scientific studies examining the impact of lifestyle interventions on levels of chemicals in humans. Where studies have not been conducted, exposure reduction strategies are based upon common sources of exposure. Ongoing studies will provide further guidance on best practices for risk reduction. Because many chemicals are used for multiple purposes and in a diverse array of products, an individual may have additional exposures that will not be addressed by these general suggestions. Such individuals should consult with their healthcare provider for individualized guidance.*
